# Supplementary material for: The estrogen receptor coactivator AIB1 is a new putative prognostic biomarker in ER-positive/HER2-negative invasive lobular carcinoma of the breast
Source: Springer Nature journal article supplement (doi:10.1007/s10549-019-05138-7), 2019-02-21

## Supplementary material

**Title:** The estrogen receptor coactivator AIB1 is a new putative prognostic biomarker in ER-positive/HER2-negative invasive lobular carcinoma

**Journal:** Breast Cancer Research and Treatment

**Authors:** Ulrik Narbe, Martin Sjöström, Carina Forsare, Pär-Ola Bendahl, Sara Alkner, L.M. Fredrik Leeb-Lundberg, Kristina Lövgren, Lisa Rydén, Christian Ingvar and Mårten Fernö

**Corresponding author:** Ulrik Narbe, [ulrik.narbe@med.lu.se](mailto:ulrik.narbe@med.lu.se), Department of Clinical Sciences, Division of Oncology and Pathology, Medicon Village, SE-223 81 Lund, Lund University, Sweden

### Online Resource 1

A

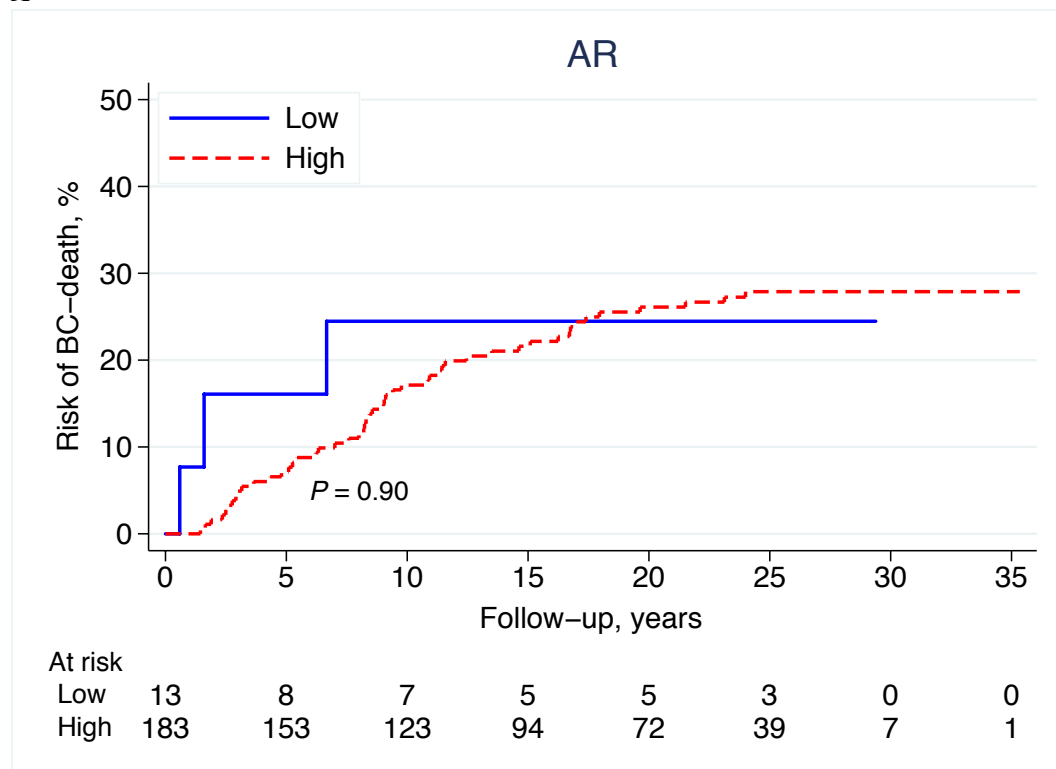

**B**

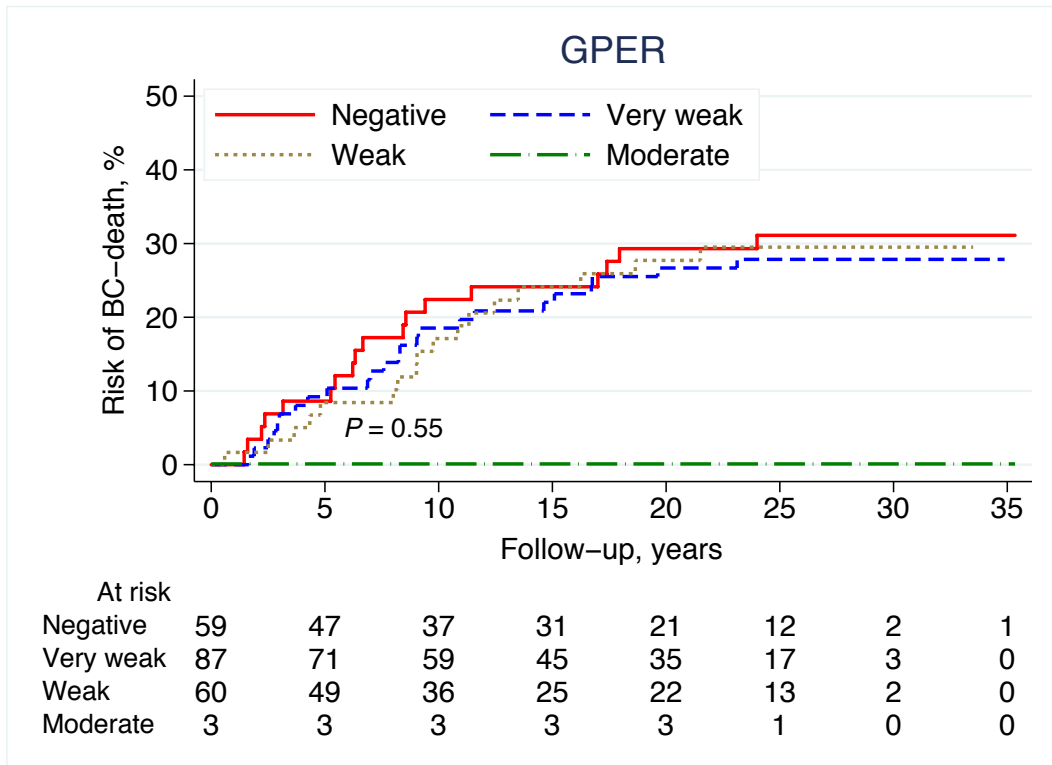

**C**

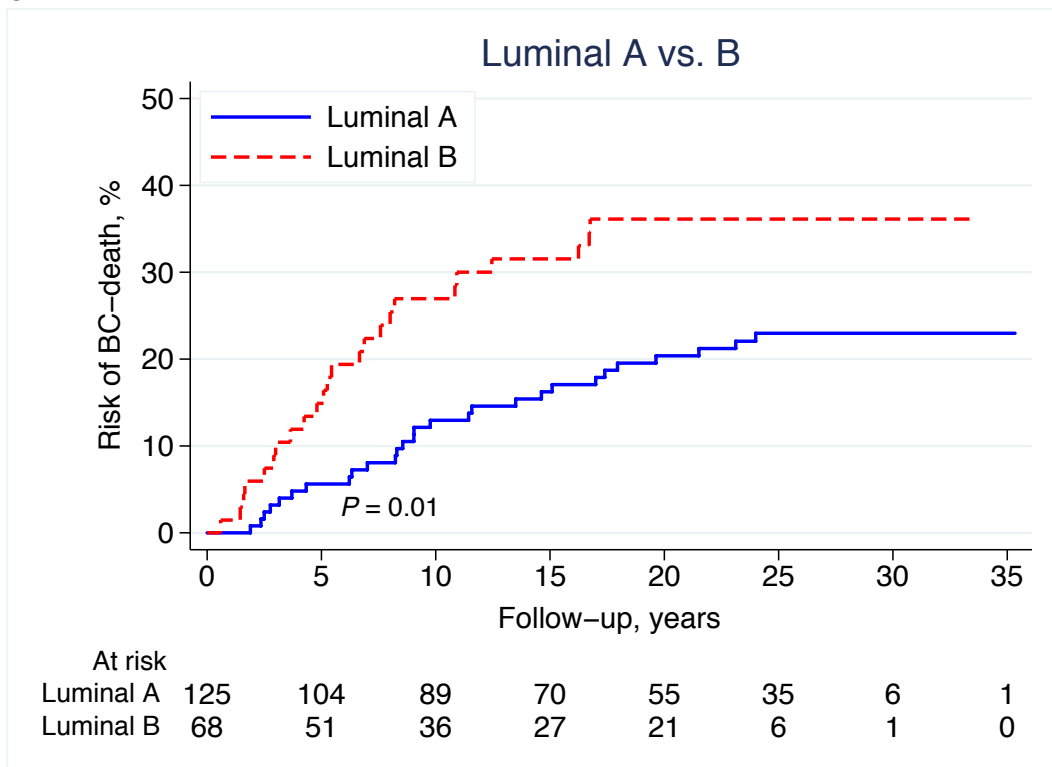

Online Resource 2

A

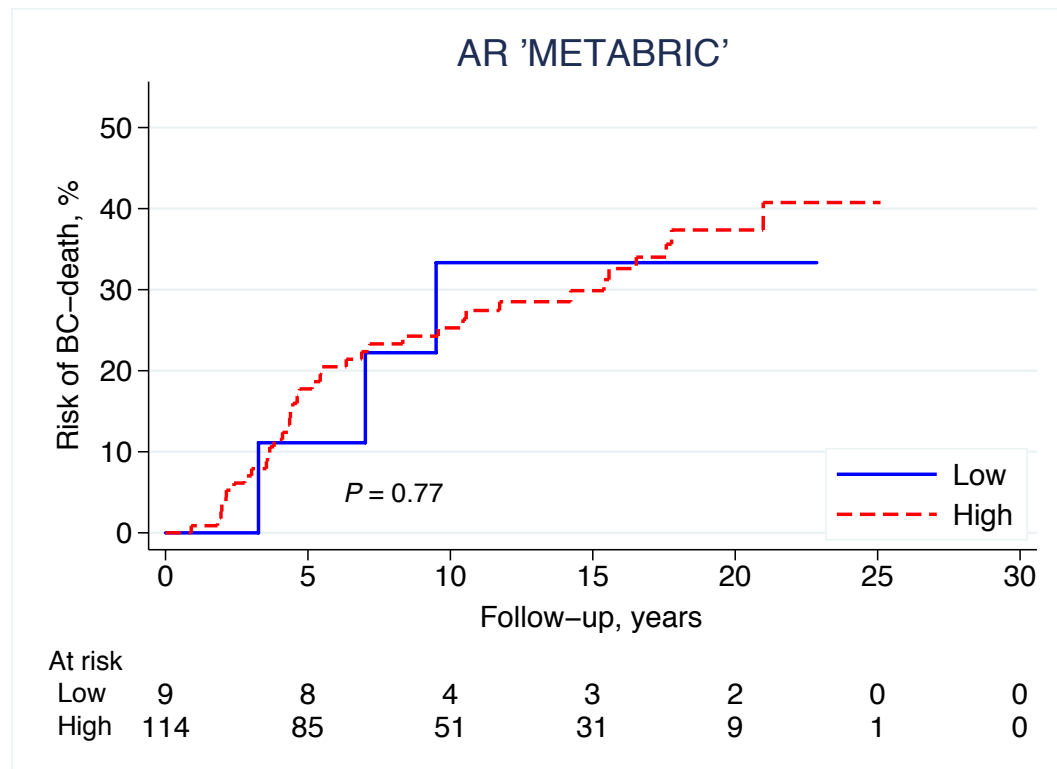

B

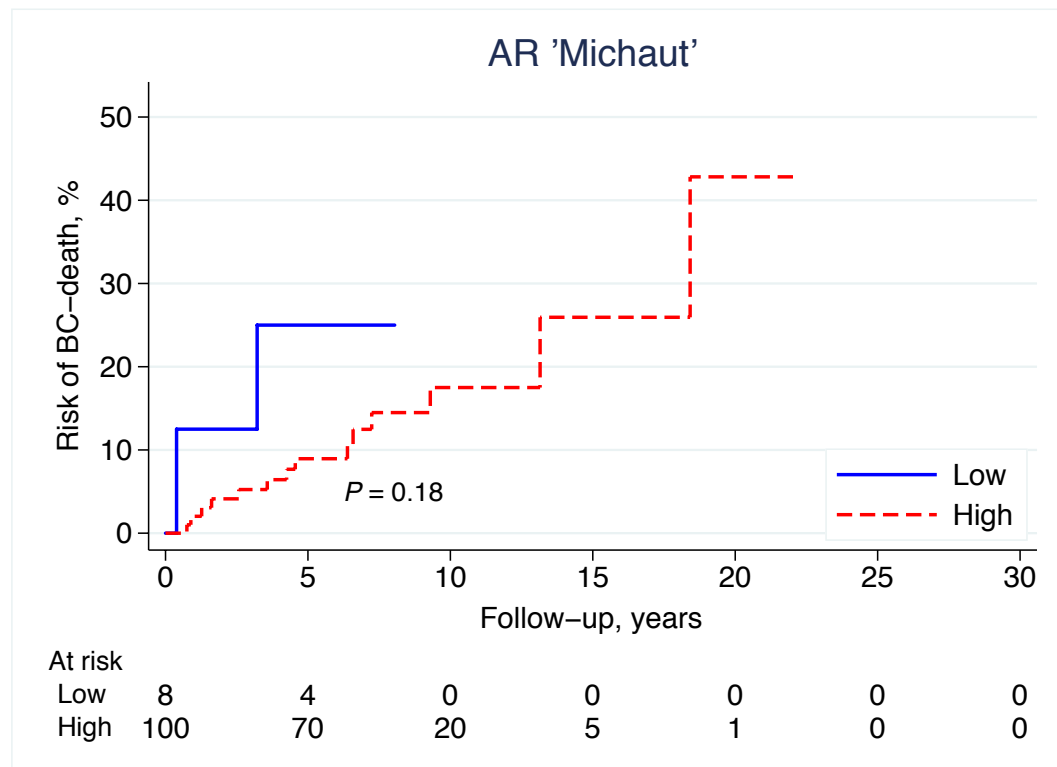

C

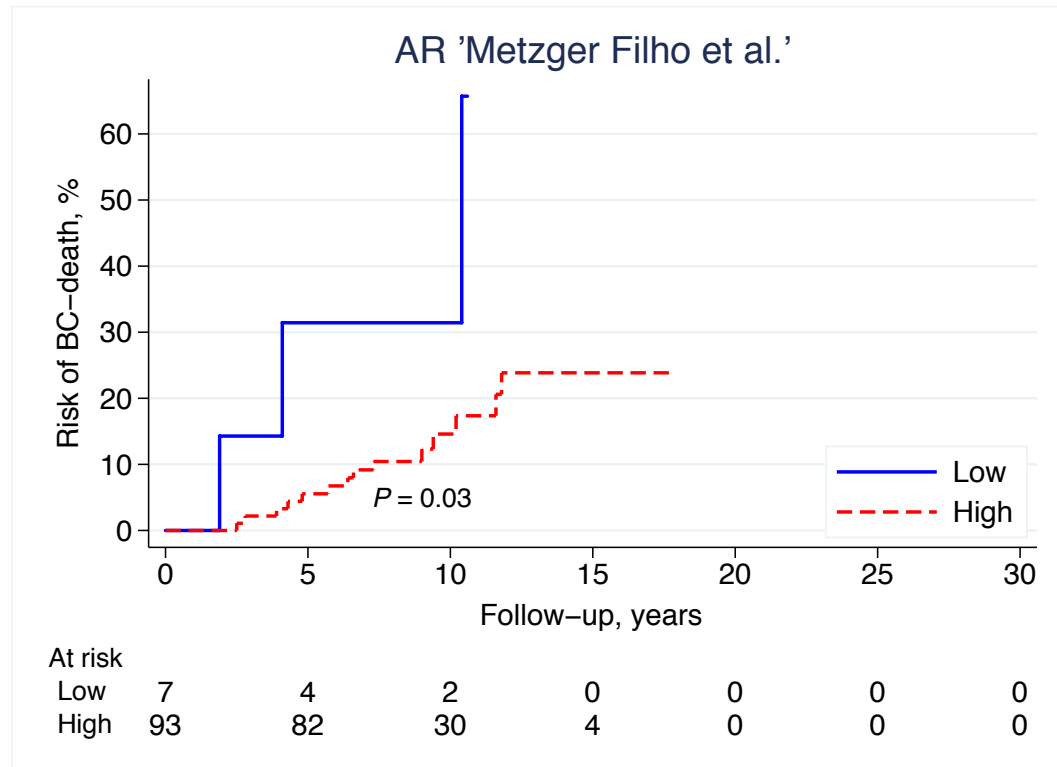

Online Resource 3

A

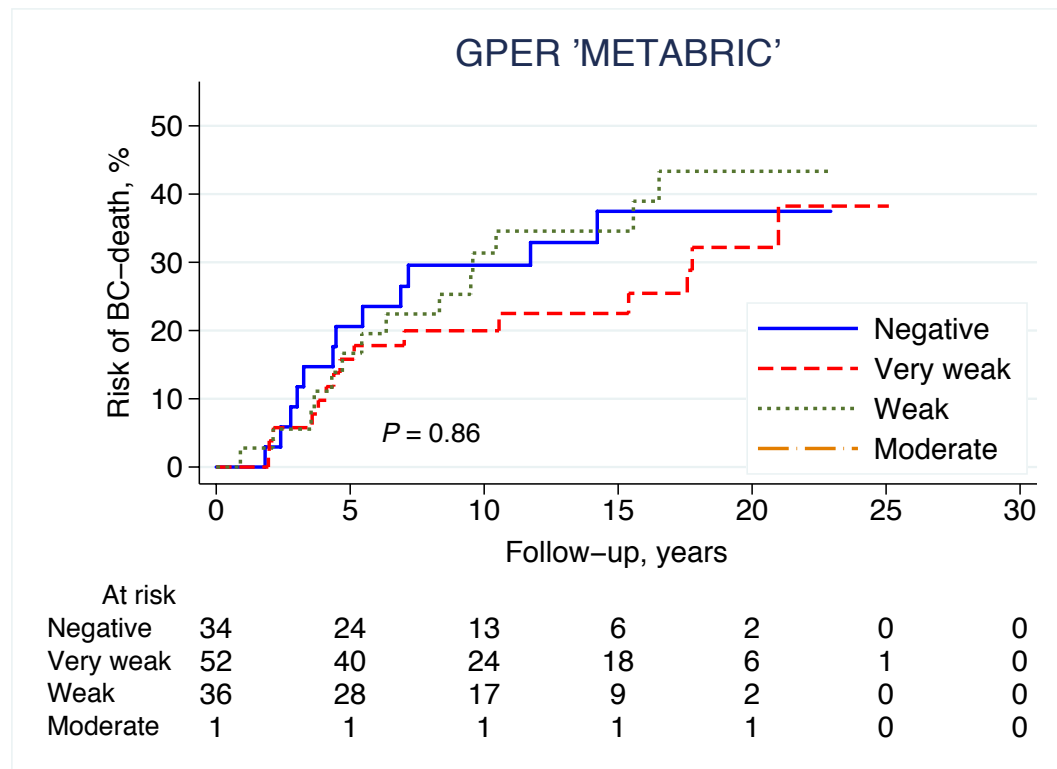

B

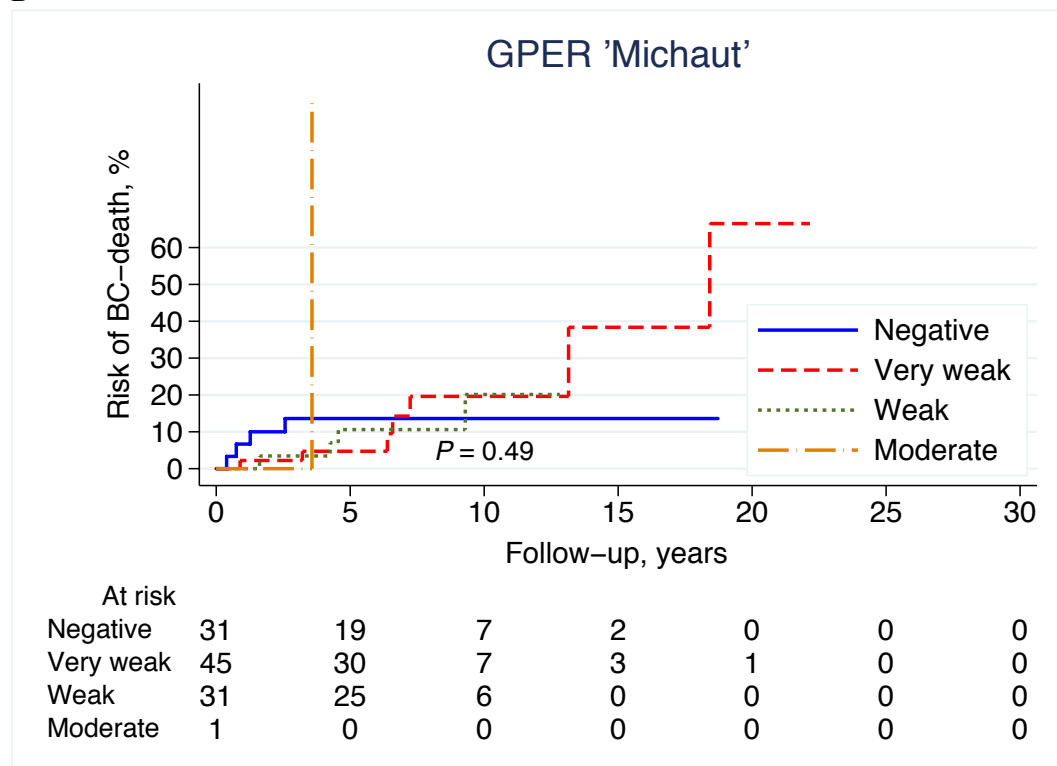

C

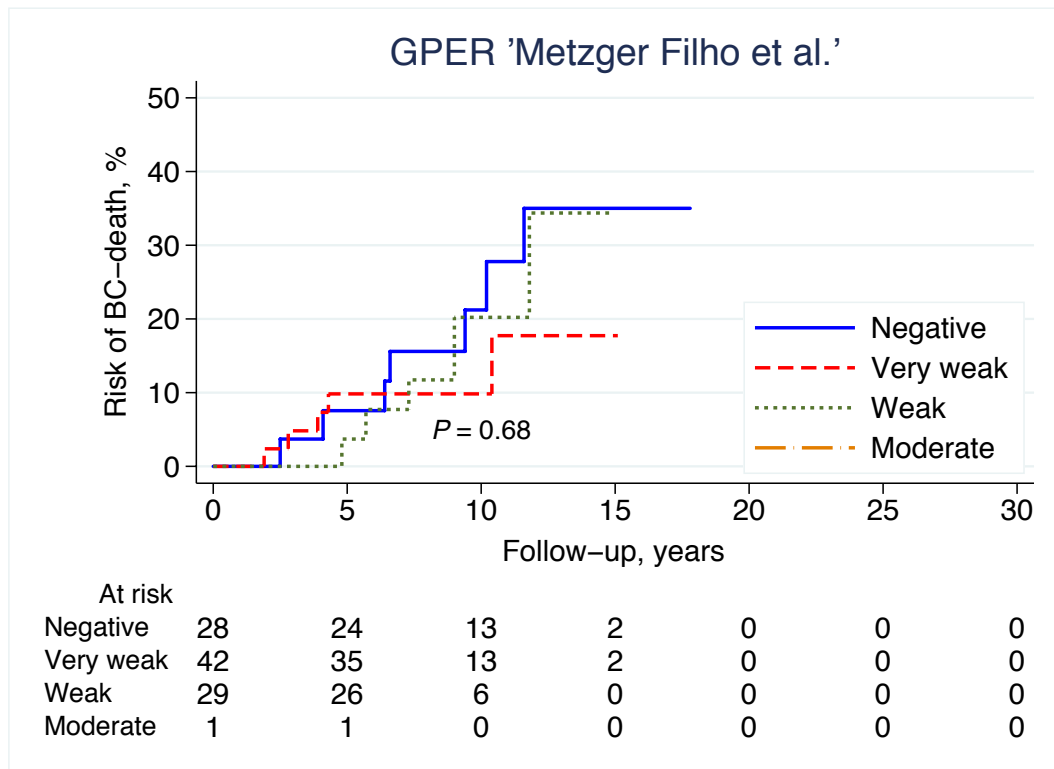

Supplement: MOESM1 [file 16501136]
